# Supplementary material for: A polyrotaxane-like metal–organic framework exhibiting luminescent sensing of Eu3+cations and proton conductivity
Source: Royal Society of Chemistry journal article supplement (doi:10.1039/c4ce00546e), 2014-01-01
Supplement: c4ce00546e1.pdf [file c4ce00546e1.pdf]

## Supporting information

### **Polyrotaxane-like metal-organic framework showing luminescent sensing of $\text{Eu}^{3+}$ cation and proton conductivity**

**Bai-Qiao Song, Xin-Long Wang,\* Guang-Sheng Yang, Hai-Ning Wang, Jun Liang,  
Kui-Zhan Shao and Zhong-Min Su\***

Institute of Functional Material Chemistry; Key Laboratory of Polyoxometalate  
Science of Ministry of Education, Northeast Normal University, Changchun, 130024  
Jilin, People's Republic of China ; E-mail: wangxl824@nenu.edu.cn,  
[zmsu@nenu.edu.cn](mailto:zmsu@nenu.edu.cn)

**Table S1. Selected bond lengths (Å) and bond angles (°)**

| Bond lengths (Å) |          |               |          |
|------------------|----------|---------------|----------|
| Cd(1)-O(4)       | 2.246(3) | Cd(1)-O(12)#1 | 2.558(3) |
| Cd(1)-O(13)#1    | 2.270(3) | Cd(2)-O(15)#2 | 2.303(3) |
| Cd(1)-O(5)       | 2.387(3) | Cd(2)-O(7)    | 2.359(3) |
| Cd(1)-O(6)       | 2.415(3) | Cd(2)-O(8)    | 2.171(3) |
| Cd(1)-O(1)       | 2.419(4) | Cd(2)-O(11)#2 | 2.428(3) |
| Cd(1)-O(14)      | 2.541(3) |               |          |

  

| Bond angles (°)     |            |                       |            |
|---------------------|------------|-----------------------|------------|
| O(4)-Cd(1)-O(13)#3  | 133.19(13) | O(1)-Cd(1)-O(14)      | 80.16(15)  |
| O(4)-Cd(1)-O(5)     | 96.31(13)  | O(6)-Cd(1)-O(14)      | 86.00(11)  |
| O(13)#3-Cd(1)-O(5)  | 92.56(14)  | O(4)-Cd(1)-O(12)#3    | 80.49(11)  |
| O(4)-Cd(1)-O(1)     | 115.14(15) | O(13)#3-Cd(1)-O(12)#3 | 53.29(12)  |
| O(13)#3-Cd(1)-O(1)  | 90.43(15)  | O(5)-Cd(1)-O(12)#3    | 91.83(12)  |
| O(5)-Cd(1)-O(1)     | 132.66(13) | O(1)-Cd(1)-O(12)#3    | 126.13(14) |
| O(4)-Cd(1)-O(6)     | 130.68(11) | O(6)-Cd(1)-O(12)#3    | 131.62(11) |
| O(13)#3-Cd(1)-O(6)  | 90.95(12)  | O(14)-Cd(1)-O(12)#3   | 134.17(11) |
| O(5)-Cd(1)-O(6)     | 54.33(10)  | O(8)-Cd(2)-O(7)       | 80.88(14)  |
| O(1)-Cd(1)-O(6)     | 78.40(13)  | O(15)#4-Cd(2)-O(7)    | 85.42(13)  |
| O(4)-Cd(1)-O(14)    | 53.68(12)  | O(8)-Cd(2)-O(11)#4    | 105.03(14) |
| O(13)#3-Cd(1)-O(14) | 170.51(14) | O(15)#4-Cd(2)-O(11)#4 | 55.56(13)  |
| O(5)-Cd(1)-O(14)    | 92.95(15)  | O(7)-Cd(2)-O(11)#4    | 138.37(13) |

Symmetry transformations used to generate equivalent atoms: #1=  $x, -y+2, z-1/2$ ;  
#2 =  $x, -y-1, z-1/2$ ; #3 =  $x, -y+2, z+1/2$ ; #4=  $x, -y-1, z+1/2$ ;

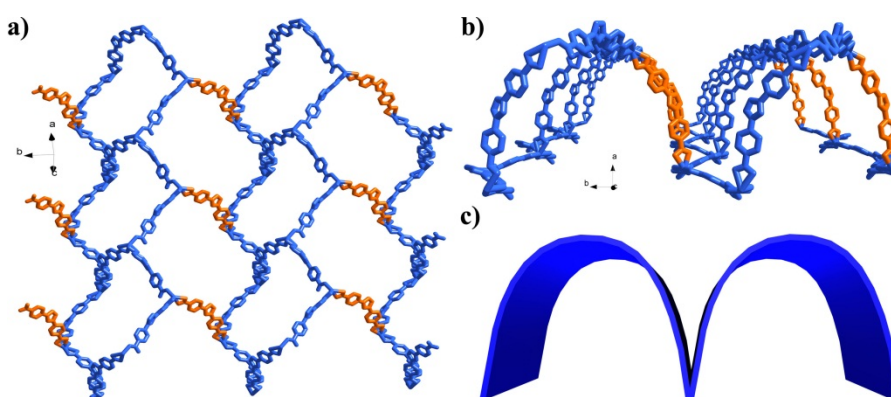

**Fig. S1** a) and b) The loop-like chains are bridged by  $L^-$  to form a 2D infinite bow-shaped (6,3) layer. C) schematic representation of the 2D infinite bow-shaped (6,3) layer.

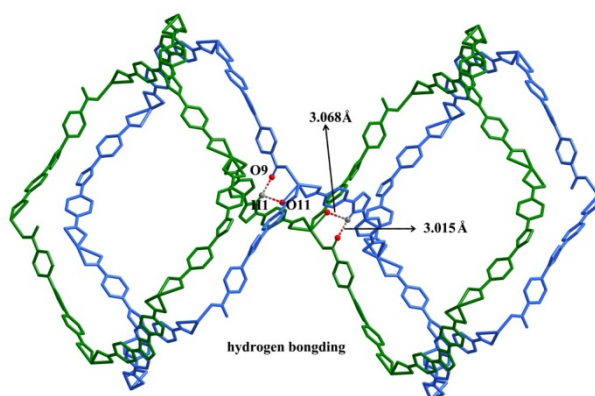

**Fig. S2** The strong hydrogen bonding ( $\text{C-H}\cdots\text{O} = 3.015\text{-}3.068 \text{ \AA}$ ) between the oxygen atoms belong to the  $[\text{Cd}_6\text{L}_6]$  6-membered ring from one 3-fold interpenetration network and the highly acidic methylene hydrogen of the imidazolium moiety of the ligand rod from another 3-fold interpenetration network.

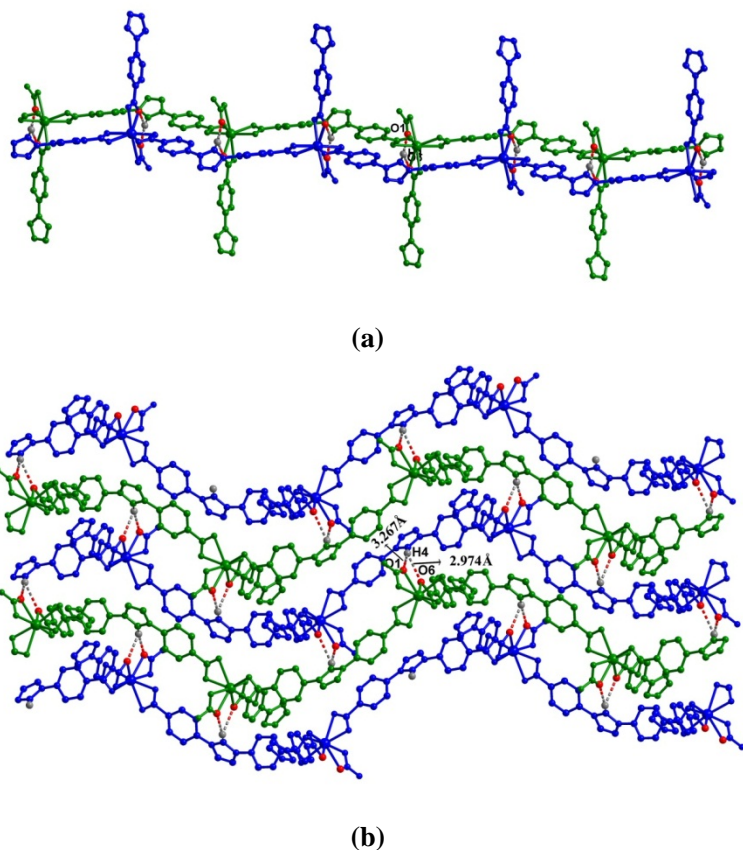

**Fig. S3** (a) The interdigitated model in **1**. (b) The strong hydrogen bonding ( $\text{C-H}\cdots\text{O} = 2.345\text{-}2.630 \text{ \AA}$ ) in the interdigitated model in **1**.

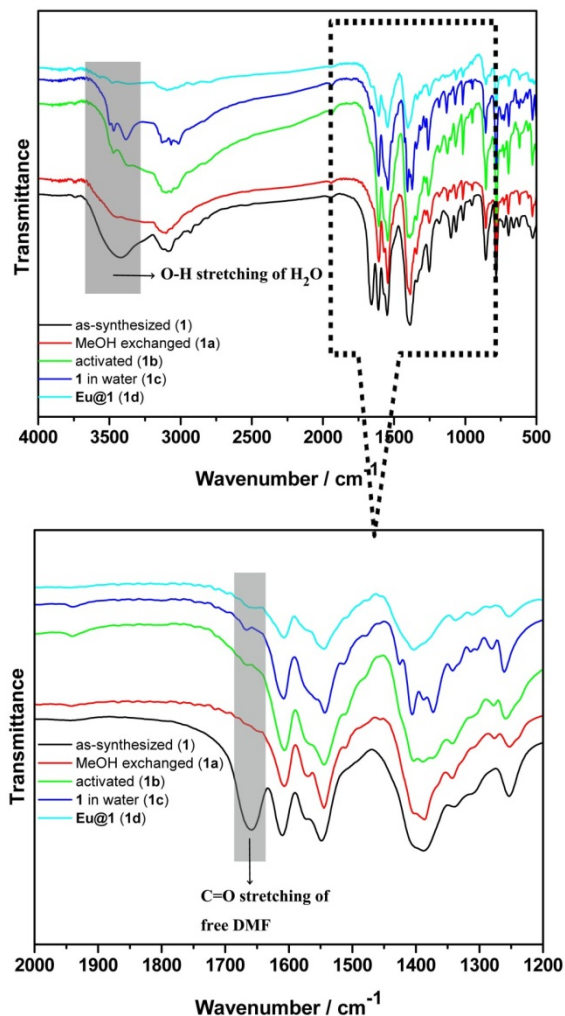

**Fig. S4** Infrared spectrum of fresh **1**, MeOH-exchanged (**1a**), activated (**1b**), **1** in water (**1c**), and **Eu@1** (**1d**). The broad peak at 3421 cm<sup>-1</sup> in the IR spectrum of **1** indicates the presence of water molecules in the structure. Sharp peaks at 1658 and 1610 cm<sup>-1</sup> ascribe to CO stretching vibrations of the free and coordinated dimethylformamide molecules, respectively, inside the channels. Another sharp peak at 1388 cm<sup>-1</sup> appears due to the presence of coordinated nitrate anions. The complete removal of the free DMF and H<sub>2</sub>O molecules was verified by the disappearance of the vibration at 1658 cm<sup>-1</sup> and 3421 cm<sup>-1</sup> in **1a** and **1b**, respectively. Interestingly, when fresh samples of **1** were immersed in 0.3 mol / L DMF solution of Eu(NO<sub>3</sub>)<sub>3</sub> for 5 days to get **Eu@1**, the IR spectrum of **Eu@1** shows scarcely any free DMF and H<sub>2</sub>O molecules in it.

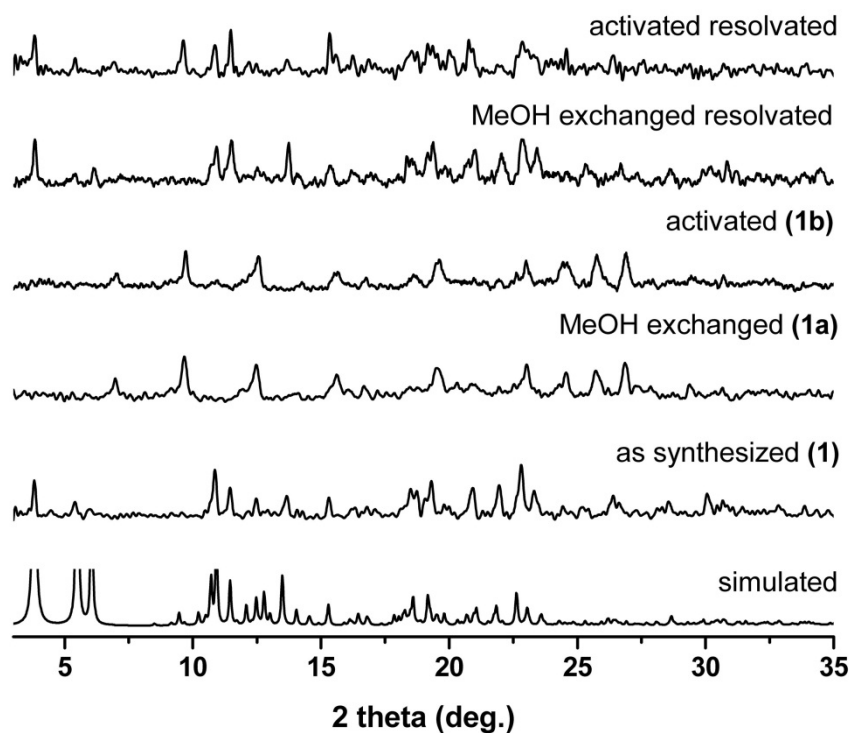

**Fig. S5** PXR profiles of as-synthesized (**1**), MeOH-exchanged (**1a**), activated (**1b**), and resolvated samples.

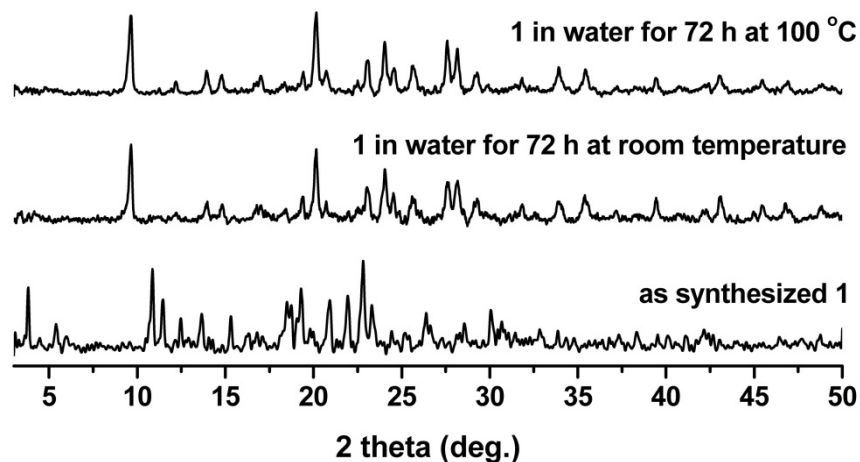

**Fig. S6** PXR profiles of as-synthesized samples and the as-synthesized samples in water under different conditions.

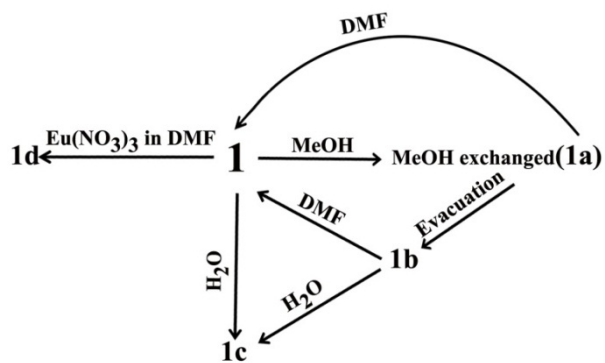

**Fig. S7** The phase transformation during different process.

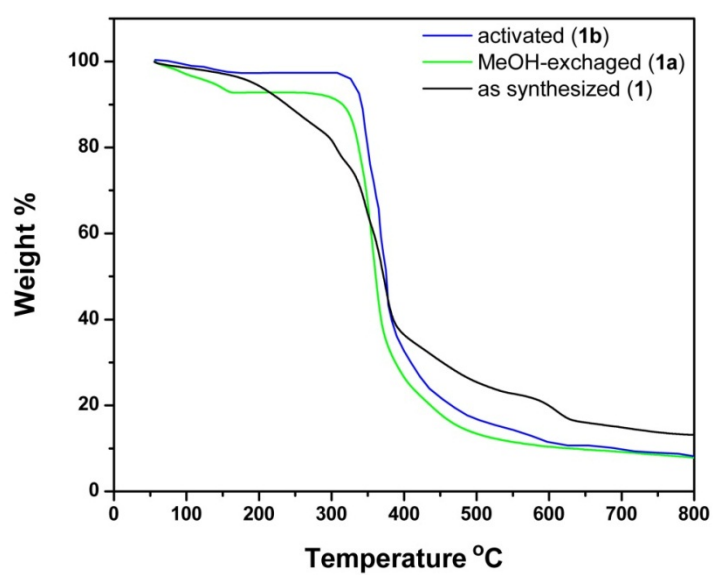

(a)

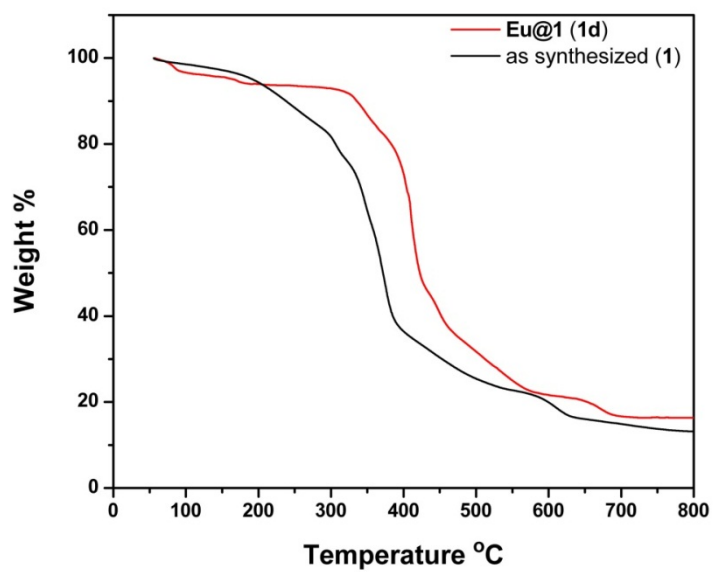

(b)

**Fig. S8** (a) TGA curves of compound **1**, MeOH-exchanged samples (**1a**), and activated samples of **1b**. (b) TGA curves of compound **1** and samples of **Eu@1 (1d)**.

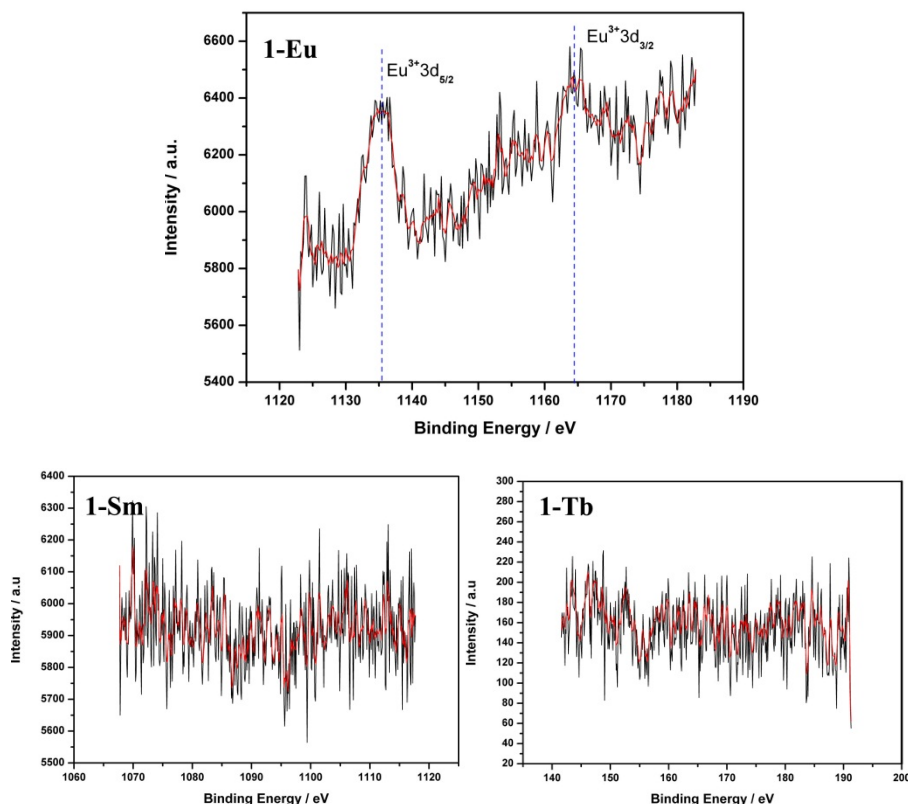

**Fig. S9** Eu 3d, Sm 3d, Tb 4d XPS spectra for **1-Eu**, **1-Sm**, **1-Tb**, respectively. **1-Ln<sup>3+</sup>** represents the samples which were immersed in 0.3 mol / L DMF solution of nitrate salts of Ln<sup>3+</sup> cations for 5 days. In the XPS spectrum of **1-Eu**, the peaks at 1135.2 eV and 1165.1 eV are assigned to the Eu 3d<sub>5/2</sub> and Eu 3d<sub>3/2</sub>, respectively. But for **1-Sm** and **1-Tb**, no peaks for Sm 3d and Tb 4d are found.

**Table S2.** ICP analysis for the samples which were immersed in 0.3 mol / L DMF solution of nitrate salts of Ln<sup>3+</sup> cations for 5 days

| ICP                       | <b>1-Eu</b>   | <b>1-Tb</b>   | <b>1-Sm</b>   | <b>1-Dy</b>   |
|---------------------------|---------------|---------------|---------------|---------------|
| <b>Cd</b>                 | <b>19.81%</b> | <b>20.97%</b> | <b>20.95%</b> | <b>21.00%</b> |
| <b>Ln</b>                 | <b>2.95%</b>  | <b>0</b>      | <b>0</b>      | <b>0</b>      |
| <b>Ln:Cd(wt:wt)</b>       | <b>0.15:1</b> | <b>0</b>      | <b>0</b>      | <b>0</b>      |
| <b>Ln:Cd(molar:molar)</b> | <b>0.11:1</b> | <b>0</b>      | <b>0</b>      | <b>0</b>      |

**1-Ln<sup>3+</sup>** represents the samples which were immersed in 0.3 mol / L DMF solution of nitrate salts of Ln<sup>3+</sup> cations for 5 days.

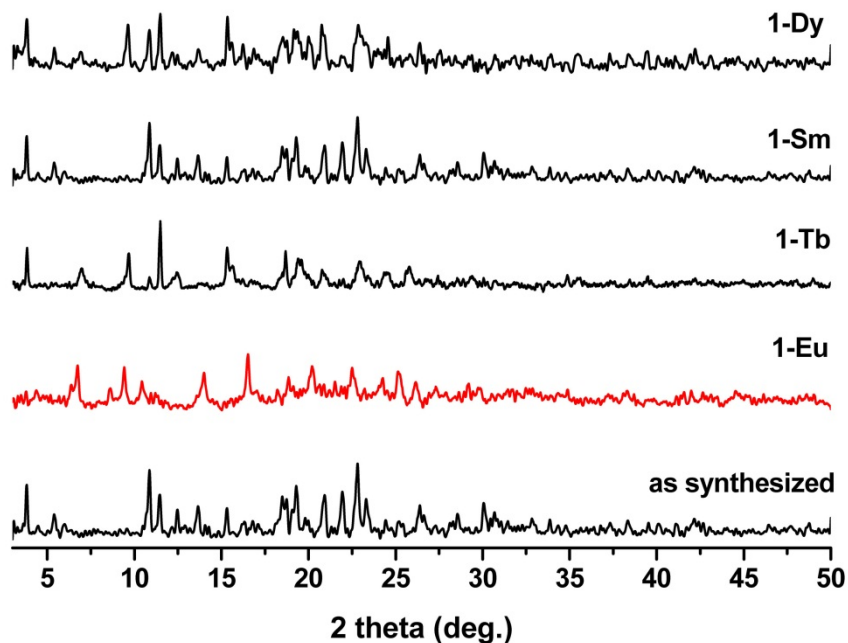

**Fig. S10** PXRD profiles of as-synthesized samples and **1-Ln** samples which were soaked in 0.3 mol / L DMF solution of nitrate salts of  $\text{Ln}^{3+}$  cations for 5 days.

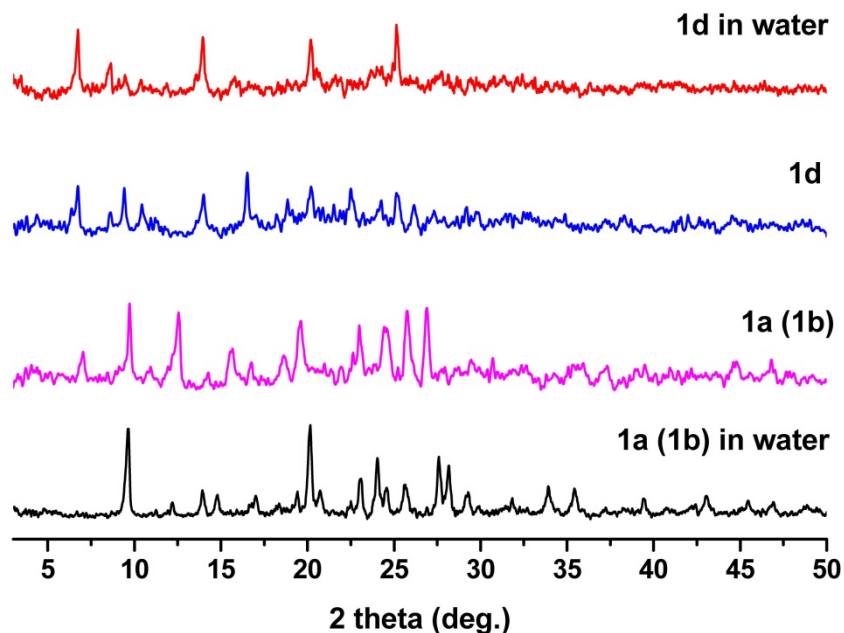

**Fig. S11** PXRD profiles of MeOH-exchanged (**1a**) samples, desolvated samples (**1b**), samples of **1a** or **1b** in water, samples of **Eu@1** (**1d**), and samples of **1d** in water.



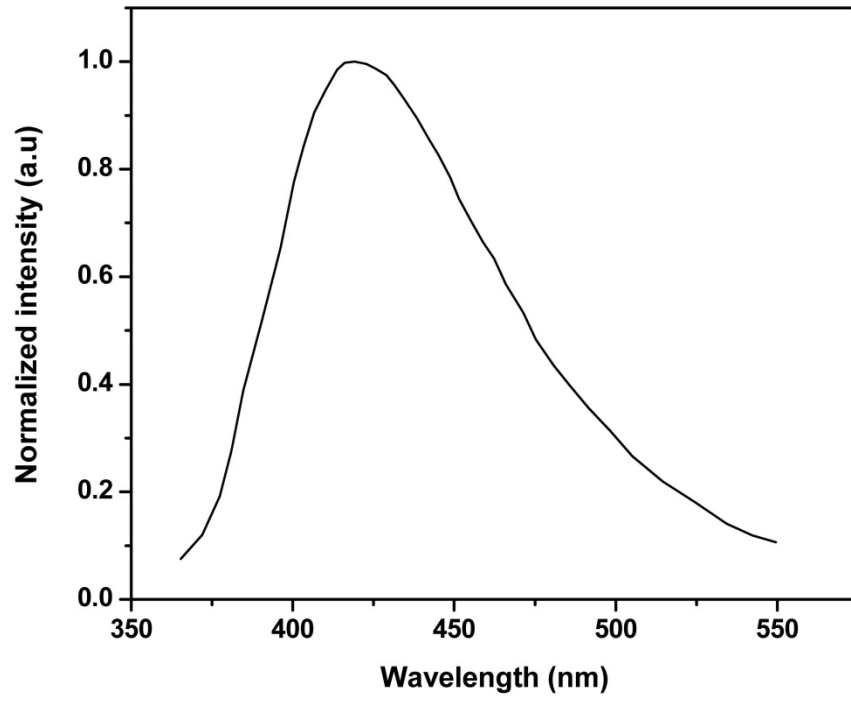

(a)

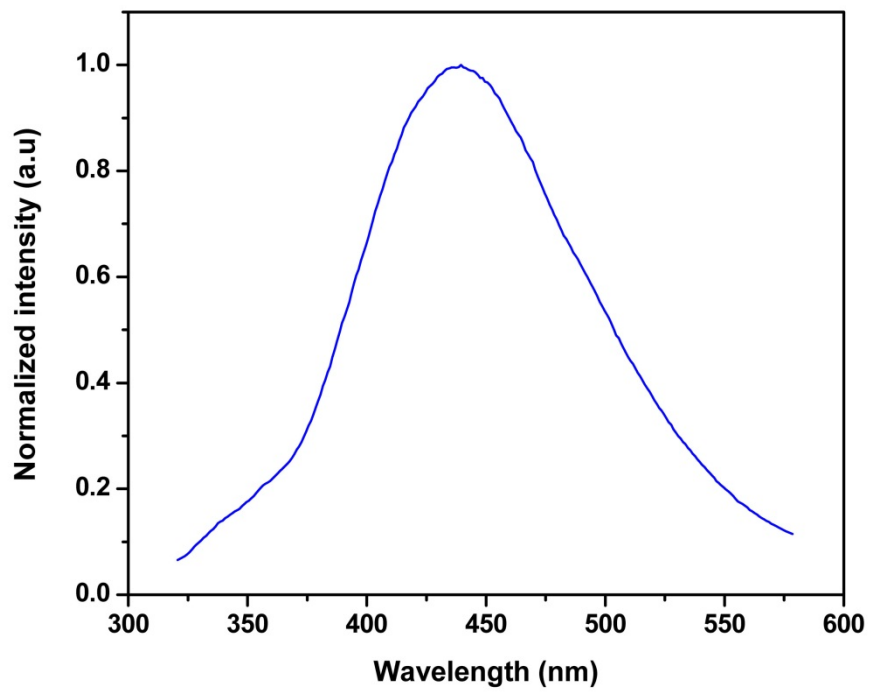

(b)

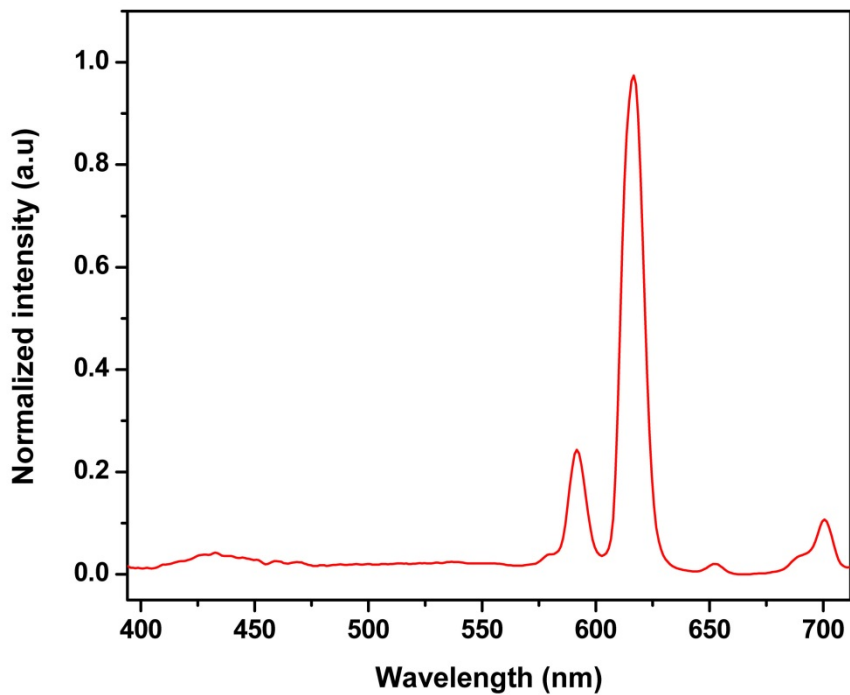

(c)

**Fig. S12** (a) Solid-state photoluminescent spectra of  $\text{H}_2\text{L}^+\text{Cl}^-$  ( $\lambda_{\text{ex}} = 340$  nm and  $\lambda_{\text{em}} = 420$  nm). (b) Solid-state photoluminescent spectra of **1** ( $\lambda_{\text{ex}} = 340$  nm and  $\lambda_{\text{em}} = 438$  nm). (c) The visible emission spectra of **Eu@1** with  $\lambda_{\text{ex}} = 340$  nm in DMF.

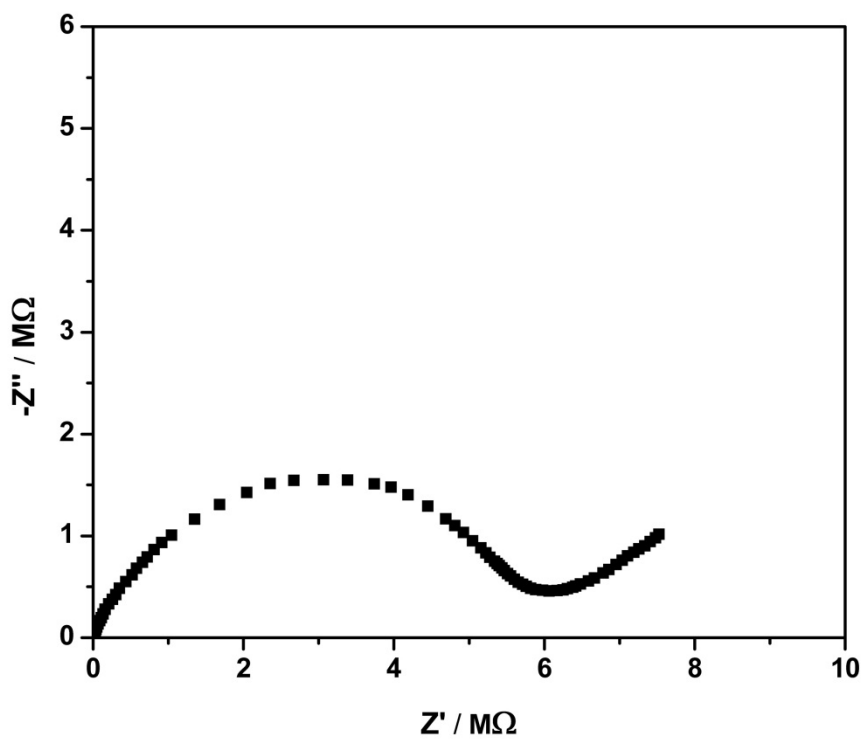

(a)

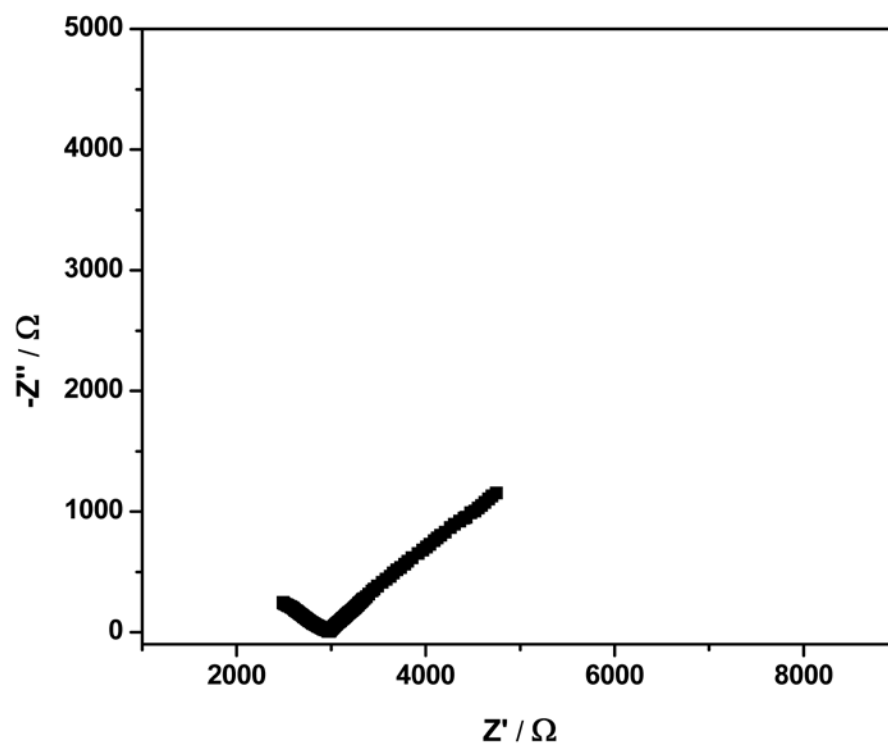

(b)

**Fig. S13** Some of the Nyquist plots for **1** at 298 K under different relative humidity (a) 40 % (b) 98 %.
